# Supplementary material for: A small tris(imidazolium) cage forms an N-heterocyclic carbene complex with silver(i)
Source: Royal Society of Chemistry journal article supplement (doi:10.1039/b708692j), 2007-01-01
Supplement: b708692j_1.pdf [file b708692j_1.pdf]

## Experimental details

**1,3,5-trimethylimidazole-2,4,6-triethylbenzene:** To a mixture of 1,3,5-tribromomethyl-2,4,6-triethylbenzene (4.0 g, 9.1 mmol) and imidazole (10.0 g, 146.9 mmol) was added MeOH (100 mL). The mixture was heated at reflux for 48 hours. The solvent was removed *in vacuo* resulting in yellow oil. Water (20 mL) was added to give a white precipitate, which was filtered and washed with water.

Yield = 56 %.  $^1\text{H}$  NMR (400 MHz,  $d_6$ -DMSO):  $\delta$  7.49 (s, 3H, N(CH)N), 6.94 (s, 3H, N(CH) $_2$ N), 6.89 (s, 3H, N(CH) $_2$ N), 5.25 (s, 6H, CH $_2$ ), 2.64 (q,  $^3J_{\text{H-H}} = 7.4$  Hz, 6H, CH $_2$ ), 0.80 (t,  $^3J_{\text{H-H}} = 7.4$  Hz, 3H, CH $_3$ ).  $^{13}\text{C}\{^1\text{H}\}$  NMR (100.6 MHz,  $d_6$ -DMSO):  $\delta$  144.9 (N(CH)N), 136.6 (Ar), 128.4 (N(CH) $_2$ N), 118.8 (N(CH) $_2$ N), 44.0 (CH $_2$ ), 22.7 (CH $_2$ ), 15.1 (CH $_3$ ). Elemental Analysis: Calculated for C $_{24}$ H $_{30}$ N $_6$ ·2H $_2$ O C 65.73, H 7.81, N 19.16. Found C 66.08, H 7.79, N 18.73 %.

**Cyclophane-3Br:** To a mixture of 1,3,5-tribromomethyl-2,4,6-triethylbenzene (0.150 g, 0.34 mmol) and 1,3,5-trimethylimidazole-2,4,6-triethylbenzene (0.137 g, 0.34 mmol) was added acetone (30 mL). The mixture was stirred at room temperature for 18 hours and the solvent was removed *in vacuo* resulting in white oil. THF (30 mL) was added to give a white precipitate, which was filtered and washed with THF.

Yield = 79 %.  $^1\text{H}$  NMR (400 MHz, CD $_3$ OD):  $\delta$  8.13 (s, 6H, N(CH) $_2$ N), 5.80 (s, 3H, N(CH)N), 5.57 (s, 12H, CH $_2$ ), 2.47 (q,  $^3J_{\text{H-H}} = 7.2$  Hz, 12H, CH $_2$ ), 1.16 (t,  $^3J_{\text{H-H}} = 7.2$  Hz, 18H, CH $_3$ ). MS (ES+)  $m/z$  684.0 ([M - 2Br] $^+$ , 5%).

**Cyclophane-3PF $_6$ :** The white solid was dissolved in MeOH (10 mL) and NH $_4$ PF $_6$  (10 equivalents) was added. This was stirred at room temperature for 1 hour and the resulting white precipitate was filtered and washed with MeOH.

Yield = 93 %.  $^1\text{H}$  NMR (400 MHz, CD $_3$ CN):  $\delta$  7.83 (s, 6H, N(CH) $_2$ N), 5.61 (s, 3H, N(CH)N), 5.37 (s, 12H, CH $_2$ ), 2.29 (q,  $^3J_{\text{H-H}} = 7.4$  Hz, 12H, CH $_2$ ), 1.10 (t,  $^3J_{\text{H-H}} = 7.4$  Hz, 18H, CH $_3$ ).  $^{13}\text{C}\{^1\text{H}\}$  NMR (100.6 MHz, CD $_3$ CN):  $\delta$  149.5 (Ar), 130.3 (CH), 126.5 (CH), 48.4 (CH $_2$ ), 23.8 (CH $_2$ ), 15.9 (CH $_3$ ). MS (ES+)  $m/z$  893.1 ([M - PF $_6$ ] $^+$ , 100%), 747.4 ([M - 2PF $_6$  - H] $^+$ , 13%). Elemental Analysis: Calculated for C $_{39}$ H $_{51}$ F $_{18}$ N $_6$ P $_3$  C 45.09, H 4.95, N 8.09. Found C 44.59, H 5.00, N 7.77.

**Cyclophane-[FeCl $_4$ ] $_2$ Br:** To a hot water solution (2mL) containing pyridine (0.5 mL) of 1,3,5-trimethylimidazole-2,4,6-triethylbenzene (0.01g, 0.025 mmol) was added a hot water solution (2 mL) of FeCl $_3$ ·6H $_2$ O (0.006g, 0.022mmol). The solution was allowed to cool and the solvent slowly evaporated, resulting in colourless crystals.

**Ag-Cyclophane:** To a mixture of cyclophane-3PF $_6$  (0.165 g, 0.159 mmol) and Ag $_2$ O (0.074 g, 0.319 mmol) was added DMSO (20 mL). The mixture was heated at 75 °C for 72 hours under nitrogen. The mixture was filtered through celite and water (20 mL) was added to the filtrate. The resulting precipitate was filtered and washed with water.

Yield = 31 %.  $^1\text{H}$  NMR (400 MHz, CD $_3$ CN):  $\delta$  7.68 (s, 2H, N(CH) $_2$ N), 7.46 (s, 4H, N(CH) $_2$ N), 6.55 (s, 1H, N(CH)N), 5.35 (d,  $^2J_{\text{H-H}} = 14.9$  Hz, 4H, CH $_2$ ), 5.25 (d,  $^2J_{\text{H-H}} = 14.9$  Hz, 4H, CH $_2$ ), 5.19 (s, 4H, CH $_2$ ), 2.90 (q,  $^3J_{\text{H-H}} = 7.6$  Hz, 4H, CH $_2$ ), 2.00 (m, 8H,

CH<sub>2</sub>), 1.15 (t, <sup>3</sup>J<sub>H-H</sub> = 7.6 Hz, 6H, CH<sub>3</sub>), 0.95 (t, <sup>3</sup>J<sub>H-H</sub> = 7.5 Hz, 12H, CH<sub>3</sub>). <sup>13</sup>C{<sup>1</sup>H} NMR (125.7 MHz, CD<sub>3</sub>CN): δ 178.0 (<sup>1</sup>J<sub>C-<sup>107</sup>Ag</sub> = 186.5 Hz, <sup>1</sup>J<sub>C-<sup>109</sup>Ag</sub> = 215.5 Hz), 148.4 (q), 146.7 (q), 132.7 (q), 131.3 (CH), 128.6 (q), 125.5 (CH), 124.0 (CH), 49.0 (CH<sub>2</sub>), 48.3 (CH<sub>2</sub>), 25.8 (CH<sub>2</sub>), 23.1 (CH<sub>2</sub>), 16.6 (CH<sub>3</sub>), 15.3 (CH<sub>3</sub>). MS (ES+) m/z 853.0 ([M - PF<sub>6</sub>]<sup>+</sup> 100%). Elemental Analysis: Calculated for C<sub>39</sub>H<sub>49</sub>AgF<sub>12</sub>N<sub>6</sub>P<sub>2</sub> C 46.86, H 4.94, N 8.41. Found C 46.20, H 4.93, N 8.10.
