# Supplementary figures and images for: A small tris(imidazolium) cage forms an N-heterocyclic carbene complex with silver(i)
Source: Royal Society of Chemistry journal article supplement (doi:10.1039/b708692j), 2007-01-01

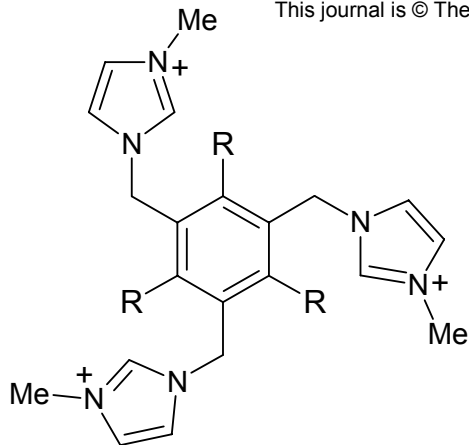

R = Me, Et, *n*-Bu

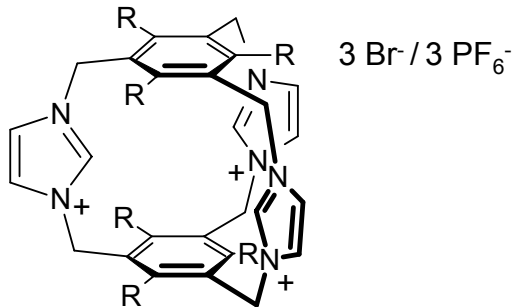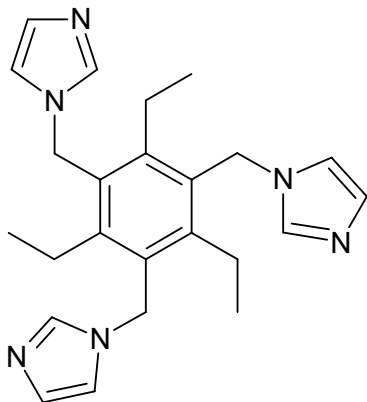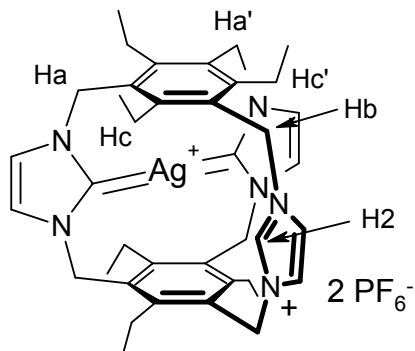

Supplement: b708692j_2.pdf [file b708692j_2.pdf]
